S5 Table. Technical aspects of online learning school (n= 3286)

| Statement                                                                | Strongly disagree<br>n (%) | Disagree<br>n (%) | Somewhat disagree<br>n (%) | Neutral<br>n (%) | Somewhat agree<br>n (%) | Agree<br>n (%)  | Strongly agree<br>n (%) | N/A<br>n (%) | Mean $\pm$<br>SD |
|--------------------------------------------------------------------------|----------------------------|-------------------|----------------------------|------------------|-------------------------|-----------------|-------------------------|--------------|------------------|
| I have the devices required for online learning                          | 12<br>(0.4%)               | 10<br>(0.3%)      | 19<br>(0.6%)               | 61<br>(1.9%)     | 121<br>(3.7%)           | 768<br>(23.4%)  | 2288<br>(69.6%)         | 7<br>(0.2%)  | 6.6 $\pm$<br>0.8 |
| I think it is acceptable to own the devices required for online learning | 76<br>(2.3%)               | 139<br>(4.2%)     | 224<br>(6.8%)              | 409<br>(12.4%)   | 627<br>(19.1%)          | 986<br>(30.0%)  | 819<br>(24.9%)          | 6<br>(0.2%)  | 5.3 $\pm$<br>1.5 |
| I feel comfortable using the software required for online learning       | 33<br>(1.0%)               | 81<br>(2.5%)      | 177<br>(5.4%)              | 372<br>(11.3%)   | 724<br>(22.0%)          | 1070<br>(32.6%) | 819<br>(24.9%)          | 10<br>(0.3%) | 5.5 $\pm$<br>1.3 |
| I feel well prepared for online learning                                 | 65<br>(2.0%)               | 137<br>(4.2%)     | 225<br>(6.8%)              | 365<br>(11.1%)   | 670<br>(20.4%)          | 1089<br>(33.1%) | 726<br>(22.1%)          | 9<br>(0.3%)  | 5.3 $\pm$<br>1.5 |

SD=standard deviation; N/A=not available
