# Supplementary material for: How COVID-19 kick-started online learning in medical education—The DigiMed study
Source: PLOS journal article supplement (doi:10.1371/journal.pone.0257394), 2021-09-21
Supplement: S2 (10.1371/journal.pone.0257394.s002) [file journal.pone.0257394.s002]

## 1. Gender

- ☐ Male
- ☐ Female
- ☐ Other

## 2. Age

### 3. Current study year

#### 4. Country where I study in

## 5. Social media:

|                                                                                        | 1 (strongly disagree) | 2 (disagree)          | 3 (somewhat disagree)            | 4 (neutral)           | 5 (somewhat agree)    | 6 (agree)             | 7 (strongly agree)    |
|----------------------------------------------------------------------------------------|-----------------------|-----------------------|----------------------------------|-----------------------|-----------------------|-----------------------|-----------------------|
| I regularly use digital media and online contents (Wikipedia, Facebook, Twitter, etc.) | <input type="radio"/> | <input type="radio"/> | <input checked="" type="radio"/> | <input type="radio"/> | <input type="radio"/> | <input type="radio"/> | <input type="radio"/> |

## 6. Online learning during the COVID-19 pandemic:

|                                                                                                 | 1 (strongly disagree) | 2 (disagree)          | 3 (somewhat disagree)            | 4 (neutral)           | 5 (somewhat agree)    | 6 (agree)             | 7 (strongly agree)    |
|-------------------------------------------------------------------------------------------------|-----------------------|-----------------------|----------------------------------|-----------------------|-----------------------|-----------------------|-----------------------|
| Since the beginning of the pandemic, my medical school successfully switched to online courses. | <input type="radio"/> | <input type="radio"/> | <input checked="" type="radio"/> | <input type="radio"/> | <input type="radio"/> | <input type="radio"/> | <input type="radio"/> |

**Before the beginning of the pandemic, my medical school already offered many online courses.**

In general, I am happy with the **quantity** of the online courses provided by my medical school.

In general, I am happy with the **quality** of the online courses provided by my medical school.

**7. The following types of online learning are offered by my medical school (multiple answers possible):**

- ☐ Interactive live lectures or seminars (webinars)
- ☐ pre-recorded lectures or seminars without possibility of interaction
- ☐ Online platforms and ressources for self-learning/self-assessment modules
- ☐ Chats (with/without video stream)
- ☐ Audio podcasts

**8. In future, I wish the following types of online learning methods will be offered by my medical school. Please rank via "drop down" from 1-5 (1=most preferred, 5=least preferred):**

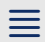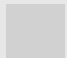

Interactive live lectures or seminars (webinars)

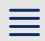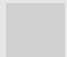

Pre-recorded lectures or seminars without possibility of interaction

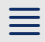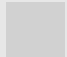

Online platforms and resources for self-learning/self-assessment modules.

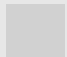

Chats (with/without video stream)

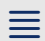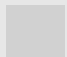

Audio podcasts

## 9. Technical aspects of online learning:

|                                                                                                                                                           | 1 (strongly disagree) | 2 (disagree)          | 3 (somewhat disagree) | 4 (neutral)           | 5 (somewhat agree)    | 6 (agree)             | 7 (strongly agree)    |
|-----------------------------------------------------------------------------------------------------------------------------------------------------------|-----------------------|-----------------------|-----------------------|-----------------------|-----------------------|-----------------------|-----------------------|
| I have the devices available required for online learning (computer, tablet, smartphone, etc).                                                            | <input type="radio"/> | <input type="radio"/> | <input type="radio"/> | <input type="radio"/> | <input type="radio"/> | <input type="radio"/> | <input type="radio"/> |
| I think it is acceptable to invest in electronic devices required for online learning (computer, tablet, etc.).                                           | <input type="radio"/> | <input type="radio"/> | <input type="radio"/> | <input type="radio"/> | <input type="radio"/> | <input type="radio"/> | <input type="radio"/> |
| I feel comfortable using the software solutions used for online learning (e.g. Microsoft Teams, Moodle, Google Hangout, Zoom, GoTo-Meeting, Skype, etc.). | <input type="radio"/> | <input type="radio"/> | <input type="radio"/> | <input type="radio"/> | <input type="radio"/> | <input type="radio"/> | <input type="radio"/> |
| In general, I feel well prepared for online learning.                                                                                                     | <input type="radio"/> | <input type="radio"/> | <input type="radio"/> | <input type="radio"/> | <input type="radio"/> | <input type="radio"/> | <input type="radio"/> |

## 10. I prefer the following device for online learning:

## 11. Online learning in medical education:

|                                                                                                  | 1 (strongly disagree) | 2 (disagree)          | 3 (somewhat disagree) | 4 (neutral)           | 5 (somewhat agree)               | 6 (agree)             | 7 (strongly agree)    |
|--------------------------------------------------------------------------------------------------|-----------------------|-----------------------|-----------------------|-----------------------|----------------------------------|-----------------------|-----------------------|
| Online learning offers sufficient possibilities to interact with the lecturers.                  | <input type="radio"/> | <input type="radio"/> | <input type="radio"/> | <input type="radio"/> | <input checked="" type="radio"/> | <input type="radio"/> | <input type="radio"/> |
| Online learning increases the quality of medical education in general.                           | <input type="radio"/> | <input type="radio"/> | <input type="radio"/> | <input type="radio"/> | <input type="radio"/>            | <input type="radio"/> | <input type="radio"/> |
| Online learning should play a more prominent role in medical education even beyond the pandemic. | <input type="radio"/> | <input type="radio"/> | <input type="radio"/> | <input type="radio"/> | <input checked="" type="radio"/> | <input type="radio"/> | <input type="radio"/> |

## 12. My involvement with online learning:

[illegible]

### 13. The future of online learning:

[illegible]

## 14. Switching to online learning

|                                                                                                                          | 1 (much less)         | 2 (less)              | 3 (a bit less)        | 4 (neutral)           | 5 (a bit higher)                 | 6 (higher)            | 7 (much higher)       |
|--------------------------------------------------------------------------------------------------------------------------|-----------------------|-----------------------|-----------------------|-----------------------|----------------------------------|-----------------------|-----------------------|
| Regarding yourself, did switching to online learning lead to a <b>higher</b> or a <b>lower</b> participation in courses? | <input type="radio"/> | <input type="radio"/> | <input type="radio"/> | <input type="radio"/> | <input checked="" type="radio"/> | <input type="radio"/> | <input type="radio"/> |

**15. How much are the following teaching concepts suitable for online learning?**

|                                                   | 1<br>(completely<br>unsuitable) | 2<br>(unsuitable)     | 3 (a bit<br>unsuitable) | 4 (neutral)           | 5 (a bit<br>suitable) | 6 (suitable)          | 7 (highly<br>suitable) |
|---------------------------------------------------|---------------------------------|-----------------------|-------------------------|-----------------------|-----------------------|-----------------------|------------------------|
| Lecture                                           | <input type="radio"/>           | <input type="radio"/> | <input type="radio"/>   | <input type="radio"/> | <input type="radio"/> | <input type="radio"/> | <input type="radio"/>  |
| Seminar                                           | <input type="radio"/>           | <input type="radio"/> | <input type="radio"/>   | <input type="radio"/> | <input type="radio"/> | <input type="radio"/> | <input type="radio"/>  |
| Bedside teaching                                  | <input type="radio"/>           | <input type="radio"/> | <input type="radio"/>   | <input type="radio"/> | <input type="radio"/> | <input type="radio"/> | <input type="radio"/>  |
| Practical training,<br>e.g. simulator<br>training | <input type="radio"/>           | <input type="radio"/> | <input type="radio"/>   | <input type="radio"/> | <input type="radio"/> | <input type="radio"/> | <input type="radio"/>  |

**16. Before the pandemic, the mix between offline and online learning was:**

On-site (100%)      Equal mix (50%/50%)      Online (100%)

☐ ☐ ☐

**17. In future, the perfect mix between offline and online learning is:**

On-site (100%)      Equal mix (50%/50%)      Online (100%)

☐ ☐ ☐

**Thank you very much for your participation!**

**The DigiMED 2020 team**
