# Supplementary material for: How COVID-19 kick-started online learning in medical education—The DigiMed study
Source: PLOS journal article supplement (doi:10.1371/journal.pone.0257394), 2021-09-21

S3 Figure. Ranking of the participants' preferences regarding their desired types of online learning currently offered and in future

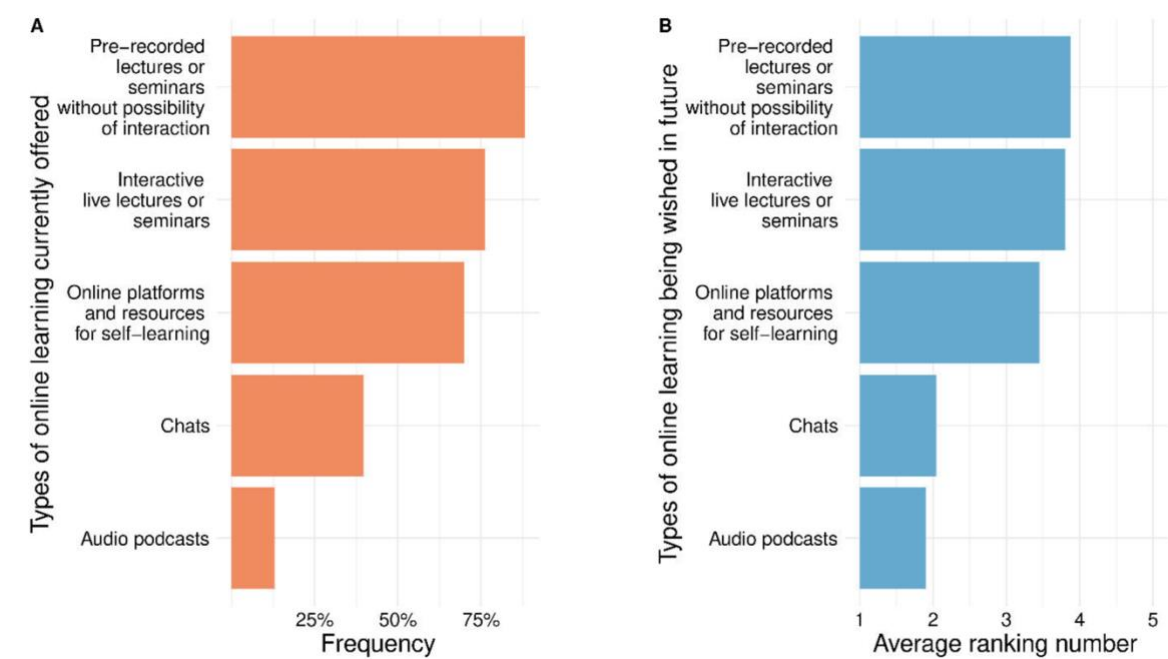

Supplement: S3 (10.1371/journal.pone.0257394.s003) [file journal.pone.0257394.s003]
