# Supplementary material for: How COVID-19 kick-started online learning in medical education—The DigiMed study
Source: PLOS journal article supplement (doi:10.1371/journal.pone.0257394), 2021-09-21
Supplement: S4 (10.1371/journal.pone.0257394.s004) [file redirect.do]

S4 Table. Current online learning situation at medical school (n= 3286)

| Statement                                                                     | Strongly disagree<br>n (%) | Disagree<br>n (%) | Somewhat disagree<br>n (%) | Neutral<br>n (%) | Somewhat agree<br>n (%) | Agree<br>n (%)  | Strongly Agree<br>n (%) | N/A<br>n (%) | Mean $\pm$ SD |
|-------------------------------------------------------------------------------|----------------------------|-------------------|----------------------------|------------------|-------------------------|-----------------|-------------------------|--------------|---------------|
| Since the pandemic, my medical school successfully switched to online courses | 53<br>(1.6%)               | 104<br>(3.2%)     | 174<br>(5.3%)              | 381<br>(11.6%)   | 889<br>(27.1%)          | 1207<br>(36.7%) | 470<br>(14.3%)          | 8<br>(0.2%)  | 5.3 $\pm$ 1.3 |
| Before the pandemic, my medical school already offered many online courses    | 599<br>(18.2%)             | 924<br>(28.1%)    | 822<br>(25.0%)             | 477<br>(14.5%)   | 290<br>(8.8%)           | 96<br>(2.9%)    | 31<br>(0.9%)            | 47<br>(1.4%) | 2.8 $\pm$ 1.4 |
| I am happy with the quantity of online courses provided                       | 122<br>(3.7%)              | 205<br>(6.2%)     | 282<br>(8.6%)              | 458<br>(13.9%)   | 726<br>(22.1%)          | 1054<br>(32.1%) | 426<br>(13.0%)          | 13<br>(0.4%) | 4.9 $\pm$ 1.6 |
| I am happy with the quality of online courses provided                        | 126<br>(3.8%)              | 248<br>(7.5%)     | 332<br>(10.1%)             | 548<br>(16.7%)   | 870<br>(26.5%)          | 862<br>(26.2%)  | 288<br>(8.8%)           | 12<br>(0.4%) | 4.7 $\pm$ 1.6 |
| I regularly use social media                                                  | 66<br>(2.0%)               | 114<br>(3.5%)     | 130<br>(4.0%)              | 290<br>(8.8%)    | 505<br>(15.4%)          | 1178<br>(35.8%) | 99<br>(30.3%)           | 8<br>(0.2%)  | 5.6 $\pm$ 1.4 |

SD=standard deviation; N/A=not available
