# Supplementary material for: How COVID-19 kick-started online learning in medical education—The DigiMed study
Source: PLOS journal article supplement (doi:10.1371/journal.pone.0257394), 2021-09-21
Supplement: S9 (10.1371/journal.pone.0257394.s009) [file journal.pone.0257394.s009]

S9 Table. Subgroup analysis regarding gender

| Statement                                                                           | Mean value (female) | Mean value (male) | Difference between mean values | P value | Cohen's d | Effect size |
|-------------------------------------------------------------------------------------|---------------------|-------------------|--------------------------------|---------|-----------|-------------|
| Since the pandemic, my medical school successfully switched to online courses       | 5.3                 | 5.2               | 0.1                            | 0.06    | 0.073     | negligible  |
| Before the pandemic, my medical school already offered many online courses          | 2.8                 | 2.8               | 0                              | 0.78    | -0.010    | negligible  |
| I am happy with the quantity of online courses provided                             | 5.1                 | 4.9               | 0.2                            | 0.04    | 0.099     | negligible  |
| I am happy with the quality of online courses provided                              | 5.0                 | 4.6               | 0.4                            | <0.01   | 0.174     | negligible  |
| I regularly use social media                                                        | 5.7                 | 4.8               | 0.9                            | 0.02    | 0.088     | negligible  |
| I have the devices required for online learning                                     | 6.6                 | 6.6               | 0                              | 0.01    | -0.095    | negligible  |
| I think it is acceptable to own the devices required for online learning            | 5.2                 | 5.5               | 0.3                            | <0.01   | -0.178    | negligible  |
| I feel comfortable using the software required for online learning                  | 5.4                 | 5.8               | 0.4                            | <0.01   | -0.256    | small       |
| I feel well prepared for online learning                                            | 5.2                 | 5.5               | 0.3                            | <0.01   | -0.176    | negligible  |
| Online courses give me a greater flexibility                                        | 5.8                 | 5.7               | 0.1                            | 0.04    | 0.077     | negligible  |
| I find it difficult to motivate myself to follow                                    | 3.9                 | 4.1               | 0.2                            | 0.03    | -0.082    | negligible  |
| Online learning bears the risk of social isolation                                  | 4.9                 | 4.8               | 0.1                            | 0.18    | 0.049     | negligible  |
| Online learning offers sufficient possibilities to interact with my fellow students | 3.0                 | 3.0               | 0                              | 0.58    | -0.021    | negligible  |
| I am concerned about my privacy when using online learning                          | 2.6                 | 2.6               | 0                              | 0.67    | 0.016     | negligible  |
| Online learning offers sufficient possibilities to interact with the lecturer       | 4.2                 | 4.1               | 0.1                            | 0.14    | -0.054    | negligible  |
| Online learning increases the quality of medical education                          | 3.9                 | 3.9               | 0                              | 0.93    | -0.003    | negligible  |
| Online learning should play a more prominent role in medical education              | 4.7                 | 4.8               | 0.1                            | 0.53    | -0.030    | negligible  |
| Medical education is lagging behind in online learning                              | 5.4                 | 5.4               | 0                              | 0.59    | 0.020     | negligible  |
| Online learning can harmonize the curricula                                         | 4.3                 | 4.3               | 0                              | 0.32    | -0.037    | negligible  |
| I expect lecturers to be familiar with online learning                              | 5.6                 | 5.6               | 0                              | 0.09    | -0.063    | negligible  |
| Lecturers have sufficient previous experience in online learning                    | 3.4                 | 3.4               | 0                              | 0.67    | 0.016     | negligible  |
| Switching to online courses led to a higher participation in courses                | 4.3                 | 4.2               | 0.1                            | 0.01    | 0.106     | negligible  |
